## **Surgical strategy for atrial functional mitral regurgitation with atrial fibrillation**

Chunrong Bao,MD1,Ke Wei,MD1, Dongfang Zhao,MD2,Junwen Zhang, MD1, Ju Mei,  
MD1, Nan Ma, MD1

1. Department of Cardiothoracic Surgery, Xinhua Hospital, School of Medicine,  
Shanghai Jiaotong University, China

2. NSW Health Pathology, Sydney, NSW, Australia

Chunrong Bao and Ke Wei are co-first authors.

Correspondence to:

Ju Mei, Professor

Department of Cardiothoracic Surgery, Xinhua Hospital, School of Medicine, Shanghai  
Jiaotong University

1665, Kongjiang Road, Yangpu District, Shanghai, 200092

Tel: +86 13801669185

Email: mei\_ju63@126.com

Nan Ma, Professor

Department of Cardiothoracic Surgery, Xinhua Hospital, School of Medicine, Shanghai  
Jiaotong University

1665, Kongjiang Road, Yangpu District, Shanghai, 200092

Tel: +86 15001994818

Email: manancts@sina.com

Running head : Surgical strategy for AFMR with AF

**Disclosures:** The authors have declared that no conflict of interest exists.

**Funding:** The work was sponsored by National Natural Science Foundation of China (grant number: 82170313)

1        **Abstract**

2        Background

3            With the growing prevalence of atrial fibrillation (AF), atrial functional mitral  
4 regurgitation (AFMR) combined with AF is expected to become a common clinical issue. We  
5 have summarized various surgical treatment strategies based on the degree of mitral  
6 regurgitation (MR) alongside rhythm control therapy for patients with AFMR and AF.

7        Methods

8            This retrospective study included 145 patients with AF and MR from January 2017 to  
9 January 2023. 33 patients with AF and moderate AFMR were designated as the moderate  
10 atrial regurgitation (MAR) group. 56 patients with AF and severe AFMR were designated as  
11 the severe atrial regurgitation (SAR) group. The remaining 56 patients with AF and severe  
12 primary MR were designated as the severe primary regurgitation (SPR) group. All patients in  
13 the MAR group underwent thoracoscopic AF procedure via a unilateral approach. Patients in  
14 the SAR and SPR groups underwent mitral valvuloplasty plus the Cox Maze IV procedure  
15 (CMP IV). Descriptive characteristics and outcomes were analysed.

16       Results

17            Twenty-three patients maintained sinus rhythm (SR) following thoracoscopic AF  
18 procedure in the MAR group at average  $2.6 \pm 1.1$  years follow-up. The degree of regurgitation  
19 improved in 26 patients, remained unchanged in 6 patients, and worsened in 1 patient. SR  
20 maintenance benefits MR reduction ( $P < 0.0001$ ) compared to the non-SR patients. There was  
21 no significant difference in the rate of SR maintenance following mitral valvuloplasty plus  
22 CMP IV between SAR (43 patients, 79.6%) and SPR (49 patients, 87.5%) groups. At the last  
23 follow-up, echocardiography in the SAR group showed 47 cases with no mitral regurgitation,

24 4 cases with mild regurgitation, and 1 case with moderate regurgitation. The left atrial  
25 diameter in the SAR group remained larger than in the SPR group ( $P<0.001$ ).

## 26 Conclusions

27 Rhythm control therapy is the cornerstone treatment for AFMR patients with AF.  
28 Thoracoscopic AF procedure is effective and minimally invasive for moderate AFMR  
29 patients with AF. For severe AFMR patients with AF, we recommend CMP IV plus mitral  
30 valvuloplasty for safety and effectiveness.

31 Keywords: atrial functional mitral regurgitation; atrial fibrillation; thoracoscopic  
32 ablation; Cox-Maze IV procedure;

33

34

35

36

37

38

39

40

41

42

43

44

## 45           **Introduction**

46           Atrial functional mitral regurgitation (AFMR) is receiving increasing attention as a type  
47 of functional mitral regurgitation (MR) secondary to structural or functional abnormalities of  
48 the left atrium <sup>1</sup>. Clinically, it is more common in patients with non-paroxysmal atrial  
49 fibrillation (AF) <sup>2,3</sup>. Epidemiological studies have shown that the incidence of moderate to  
50 severe AFMR in patients with persistent AF is 4-8%, rising to 28% in those with AF lasting  
51 more than 10 years <sup>4,5</sup>. With the growing prevalence of AF, AFMR combined with AF is  
52 expected to become a common clinical issue. However, there is still a lack of research  
53 (particularly surgical studies) addressing this combination. <sup>6,7</sup>. Utilising a single treatment  
54 modality for MR with functional regurgitation is often unsatisfactory. Results from catheter  
55 ablation studies suggest that restoring sinus rhythm (SR) can reduce valve regurgitation  
56 through cardiac remodelling. However, the success rate of catheter ablation and the certainty  
57 of cardiac remodelling in reducing regurgitation remain concerning. We have summarized  
58 data from AFMR patients with AF treated at our centre, employing different treatment  
59 strategies based on the degree of MR alongside rhythm control therapy.

## 60           **Methods**

### 61           *Patient Selection & Characteristics*

62           This retrospective cohort study included 145 patients with AF and MR treated at the  
63 Department of Cardiothoracic Surgery, Xinhua Hospital Affiliated to Shanghai Jiao Tong  
64 University School of Medicine, from January 2017 to January 2023. Thirty-three patients  
65 with AF and moderate AFMR were designated as the moderate atrial regurgitation (MAR)  
66 group. 56 patients with AF and severe AFMR were designated as the severe atrial  
67 regurgitation (SAR) group. The remaining 56 patients with AF and severe primary MR were  
68 designated as the severe primary regurgitation (SPR) group. All patients received appropriate

69 rate control, anti-hypertensives, and diuretic therapy before preoperative cardiac echo  
70 examination. The diagnostic criteria for AFMR are based on relevant literature: exclusion of  
71 organic mitral valve disease, left ventricular ejection fraction (LVEF)  $\geq 50\%$ , no abnormal left  
72 ventricular wall systolic activity, and left ventricular end-diastolic diameter  $< 55$  mm<sup>8,9</sup>. The  
73 degree of mitral regurgitation was diagnosed according to guidelines and confirmed by two  
74 physicians.

75 The MAR group included 20 males and 13 females, with an average age of  $70.27 \pm 6.46$   
76 years. Four cases had persistent AF and 29 had long-term persistent AF. The history of AF  
77 averaged  $7.12 \pm 4.83$  years, and the median CHA2DS2-VASc score was 3 points (0-6).  
78 Preoperative echocardiography showed moderate MR in 33 cases. The left atrium diameter  
79 was  $48.15 \pm 4.19$  mm, the left ventricular end-diastolic diameter was  $49.91 \pm 3.29$  mm, and  
80 LVEF was  $56.39 \pm 4.90\%$ . Preoperative cardiac function was NYHA grade I in 1 case, grade II  
81 in 17 cases, grade III in 12 cases, and grade IV in 3 cases. There were 22 patients with  
82 tricuspid regurgitation, 8 with coronary heart disease, 19 with hypertension, 10 with diabetes,  
83 and 3 with a history of stroke. Three patients had undergone catheter ablation. Baseline  
84 characteristics of MAR group are described in Table 1.

85 In the SAR group, there were 37 males and 19 females, with an average age of  
86  $70.54 \pm 5.91$  years. All patients had long-term persistent AF with a history of  $6.10 \pm 4.32$  years.  
87 The median CHA2DS2-VASc score was 3 points (3-4). Thirty-eight patients had moderate  
88 or above tricuspid regurgitation, 15 had coronary heart disease, 42 had hypertension, 15 had  
89 diabetes, and 7 had a history of stroke. Four patients had a history of catheter ablation.

90 In the SPR group, there were 36 males and 20 females, with an average age of  
91  $66.43 \pm 6.39$  years. Forty-four patients had long-term persistent AF, and 12 had persistent AF,  
92 with an AF history of  $4.44 \pm 2.58$  years. The median CHA2DS2-VASc score was 2 points (2-

93 3). There were 23 patients with moderate or above tricuspid regurgitation, 6 with coronary  
94 heart disease, 27 with hypertension, 9 with diabetes, and 4 with a history of stroke. One  
95 patient had a history of catheter ablation. Baseline characteristics of both groups are  
96 described in Table 1.

### 97 *Surgical Procedures*

98 All patients in the MAR group underwent thoracoscopic AF procedure via a unilateral  
99 approach as previously described [5, 6]. After anesthesia, patients were positioned in the right  
100 lateral decubitus position. Chest wall incisions were made at the 6th, 7th, 8th, or 6th, 8th, and  
101 8th intercostal spaces near the inferior angle of the left scapula. The ablation routes included  
102 ablation of the left and right pulmonary veins, the posterior wall of the left atrium, the  
103 ablation line from the left pulmonary vein to the anterior mitral annulus (Dallas lesion), the  
104 ablation line from the left pulmonary vein to the resection edge of the left atrial appendage,  
105 and the ablation line between the two inferior pulmonary veins. The left atrial appendage was  
106 either resected with a stapler or clamped with an atrial appendage clip. Marshall's ligament  
107 and epicardial autonomic ganglia were ablated by ablation pen. If AF could not be terminated  
108 after all steps, cardioversion was performed.

109 Patients in the SAR and SPR groups underwent mitral valvuloplasty plus the Cox Maze  
110 IV procedure (CMP IV). These procedures were performed under general anesthesia and  
111 extracorporeal circulation. A minimally invasive approach was used to establish  
112 extracorporeal circulation through the femoral artery and vein, with a small incision made in  
113 the fourth intercostal space on the right chest wall. All mitral annuloplasties were performed  
114 with a prosthetic ring. Additional techniques included artificial chordae, partial excision of  
115 the posterior leaflets, junctional suturing, and edge-to-edge suturing. If mitral annuloplasty  
116 failed, mitral valve replacement was performed. CMP IV included standard ablation routes

117 for both the left and right atria, completed with a bipolar clamp, with isthmus ablation  
118 supplemented by cryoenergy. The left atrial appendage was resected or sutured in a double-  
119 layered linear fashion. Concomitant procedures included tricuspid valvuloplasty, coronary  
120 artery bypass grafting.

### 121 *Postoperative Care and Follow-up*

122 Postoperatively, all patients received anticoagulation therapy with warfarin. If patient's  
123 heart rate exceeded 70 beats/min, oral amiodarone would be administered for 3 months.  
124 Patients unable to maintain SR were treated with rate control. Recurrent AF was managed  
125 with cardioversion under adequate anticoagulation. Follow-up was conducted through  
126 outpatient visits and telephone calls, including symptom evaluation and 24-hour dynamic  
127 electrocardiograms at 3, 6, and 12 months, and every 6 months thereafter. Any documented  
128 atrial tachyarrhythmia episodes lasting 30 seconds or longer were considered a recurrence  
129 after a 3-month blanking period. Postoperative mitral valve function was assessed by  
130 echocardiography at 3, 6, and 12 months, and at least annually thereafter.

### 131 *Statistical Analysis*

132 Statistical analysis was performed using R (version 4.3.2). Measurements are expressed  
133 as mean  $\pm$  standard deviation and compared using the t-test. Count data are expressed as rates  
134 (percentages) and compared using Fisher's exact test. Kaplan-Meier (KM) curve was utilized  
135 to analyze the success rates of AF treatments, while differences in success rates across groups  
136 were assessed using the log-rank test, with a P-value of less than 0.05 considered statistically  
137 significant. Left atrial diameter values over time are shown in box plots, with median,  
138 quartiles, and outliers. Differences were tested using repeated measures ANOVA. Changes  
139 in MR severity are displayed in stacked bar charts, indicating patient counts and percentages.



140 Differences across stages were analyzed using Chi-square tests, with statistical significance  
141 set at  $P < 0.05$ . Factors associated with recurrence following AF ablation were identified  
142 through an extensive review of the literature and previous experiences, and included in a  
143 multivariate regression model following univariate analysis where a P-value less than 0.1 was  
144 significant. A multivariate Cox proportional hazards regression model was employed to  
145 evaluate risk factors for AF recurrence, providing a comprehensive analysis of potential  
146 predictors.

#### 147 *Ethical review*

148 This study has been approved by the Medical Ethics Committee of Xinhua Hospital  
149 Affiliated to Shanghai Jiaotong University School of Medicine, and informed consent was  
150 obtained from all participants.

## 151 **Results**

### 152 *Clinical Outcomes of AF Combined with Moderate AFMR*

153 Thoracoscopic AF procedure via a unilateral approach was successfully performed in all  
154 patients in the MAR group. There was no conversion to thoracotomy and no perioperative  
155 mortality. No blood products were transfused, and no serious postoperative complications  
156 occurred. SR was maintained in 30 patients (90.9%) at discharge. Echocardiography before  
157 discharge showed no mitral regurgitation in 18 cases, mild mitral regurgitation in 10 cases,  
158 and moderate mitral regurgitation in 4 cases. The left atrium diameter ( $47.06 \pm 3.99$  mm), left  
159 ventricular end-diastolic diameter ( $49.58 \pm 3.16$  mm), and LVEF ( $55.73 \pm 5.40\%$ ) were not  
160 statistically different from pre-procedure measurements.

161 The last follow-up was in June 2023, with follow-up durations ranging from 1 to 6 years  
162 (average:  $2.6\pm 1.1$  years). Twenty-three patients (69.70%) maintained SR, confirmed by 24-  
163 hour electrocardiography. The Kaplan-Meier curve illustrating freedom from AF recurrence  
164 is shown in Figure 1A. At the last follow-up, 17 patients had no mitral regurgitation, 9 had  
165 mild mitral regurgitation, 6 had moderate mitral regurgitation, and 1 had severe mitral  
166 regurgitation. The degree of regurgitation improved in 26 patients compared to pre-surgery  
167 levels, remained unchanged in 6 patients, and worsened in 1 patient. The left atrium diameter  
168 ( $46.42\pm 4.40$  mm), left ventricular end-diastolic diameter ( $49.94\pm 3.32$  mm), and LVEF  
169 ( $58.64\pm 3.88\%$ ) were not statistically different from pre-procedure measurements.

170 *Effects of Rhythm Control on Cardiac Remodeling and Mitral Regurgitation in the MAR*  
171 *Group*

172 Patients in the MAR group were divided into two cohorts based on their ability to  
173 maintain SR post-surgery. SR maintenance benefits MR reduction ( $P<0.0001$ ) compared to  
174 the non-SR patients (Figure 1B). The left atrial diameters of the SR and non-SR patients were  
175  $47.26\pm 4.06$  mm vs.  $50.20\pm 3.94$  mm before surgery ( $P=0.063$ ) and  $46.48\pm 4.00$  mm vs.  
176  $48.40\pm 3.84$  mm at discharge ( $P=0.209$ ), showing no statistical difference between the groups.  
177 At the last follow-up, the left atrial diameter was  $45.04\pm 3.48$  mm in the SR patients vs.  
178  $49.60\pm 4.81$  mm in the non-SR patients ( $P=0.004$ ), a statistically significant difference (Figure  
179 2A). The Corresponding changes in MR degree in SR and non-SR patients is shown in Figure  
180 2B.

181 *Clinical Outcomes of AF Combined with Severe AFMR*

182 All 56 patients in the SAR group completed the valve procedure, CMP IV, and other  
183 concomitant procedures. Two patients died within 30 days post-surgery due to postoperative

184 ARDS and pulmonary infection. Postoperative complications included bleeding, low cardiac  
185 output, pulmonary infection, and acute kidney injury. Three cases (5%) required  
186 postoperative electrical cardioversion therapy. At discharge, 50 patients (92.6%) were in SR;  
187 50 cases had no mitral regurgitation and 2 had mild mitral regurgitation. The left atrium  
188 diameter was  $48.31 \pm 2.60$  mm, significantly smaller than pre-surgery ( $P < 0.001$ ), while the left  
189 ventricular end-diastolic diameter ( $49.41 \pm 2.93$  mm,  $P = 0.056$ ) and LVEF ( $54.87 \pm 5.46\%$ ,  
190  $P = 0.385$ ) showed no significant changes from pre-surgery.

191 The mean follow-up period was  $2.6 \pm 1.1$  years. At the last follow-up, 43 patients (79.6%)  
192 in the SAR group maintained SR (KM curve shown in the Figure 3). Echocardiography  
193 showed no mitral regurgitation in 47 cases, mild regurgitation in 4 cases, and moderate  
194 regurgitation in 1 case. The left atrium diameter was  $48.46 \pm 3.80$  mm, significantly smaller  
195 than pre-surgery ( $P < 0.001$ ), while the left ventricular end-diastolic diameter ( $51.52 \pm 3.54$  mm,  
196  $P = 0.225$ ) and LVEF ( $54.80 \pm 4.93\%$ ,  $P = 0.310$ ) showed no significant differences from pre-  
197 surgery measurements.

#### 198 *Comparison of Perioperative Data between SAR and SPR Groups*

199 The SAR group patients were significantly older and had longer AF durations and more  
200 preoperative comorbidities than the SPR group. Detailed information is presented in Table 1.  
201 In the SAR group, 53 patients underwent mitral valvuloplasty with rings of varying sizes,  
202 including 11 patients with No. 28 ring, 24 patients with No. 30 ring, 16 patients with No. 32  
203 ring, and 2 patients with No. 34 ring. Three patients underwent mitral valve replacement with  
204 bioprosthetic valves. Concomitant procedures included tricuspid valvuloplasty (35 cases),  
205 coronary artery bypass grafting (8 cases), and left ventricular outflow tract obstruction (2  
206 cases). In the SPR group, 50 patients underwent mitral valvuloplasty with rings of varying  
207 sizes, including 10 patients with No. 28 ring, 23 patients with No. 30 ring, 15 patients with

208 No. 32 ring, and 2 patients with No. 34 ring. Six patients underwent mitral valve replacement  
209 (3 bioprosthetic and 3 mechanical valves). Concomitant procedures included tricuspid  
210 valvuloplasty (19 cases) and coronary artery bypass grafting (2 cases). All patients in both  
211 groups completed CMP IV. There was no perioperative mortality in the SPR group. The SAR  
212 group had a slightly higher incidence of postoperative complications (Table 2). Fifty patients  
213 (92.6%) in the SAR group and 51 patients (91.1%) in the SPR group were in SR at discharge,  
214 with no significant difference between the groups ( $P=0.368$ ). At the last follow-up, 43  
215 patients (79.6%) in the SAR group and 49 patients (87.5%) in the SPR group maintained SR.  
216 The KM curves for the SR maintenance rate showed no statistical difference between the  
217 groups (Figure 3A).

#### 218 *Comparison of Mitral Regurgitation and Cardiac Remodeling Between SAR and SPR* 219 *Groups*

220 Preoperative echocardiography revealed that in the SAR group, 53 cases were  
221 Carpentier type I and 3 were type IIIb MR. In the SPR group, there were 5 cases of  
222 Carpentier type I and 51 cases of type II MR. There was no significant difference in left atrial  
223 diameter between the groups ( $P=0.532$ ). The SPR group had a significantly larger left  
224 ventricular diameter ( $P<0.001$ ) and lower ejection fraction ( $P<0.001$ ) compared to the SAR  
225 group. Before discharge, 50 cases in the SAR group had no mitral regurgitation, and 2 had  
226 mild regurgitation. In the SPR group, 45 cases had no mitral regurgitation, 4 had mild  
227 regurgitation, and 1 had moderate regurgitation. The left atrial diameter in the SAR group  
228 was larger than in the SPR group ( $P<0.001$ ). The ejection fraction in the SAR group was  
229 lower than in the SPR group, with no significant difference in left ventricular diameter  
230 ( $P=0.077$ ). At the last follow-up, echocardiography showed that in the SAR group, 47 cases  
231 had no mitral regurgitation, 4 had mild regurgitation, and 1 had moderate regurgitation. In the

232 SPR group, 42 cases had no mitral regurgitation, 6 had mild regurgitation, 1 had moderate  
233 regurgitation, and 1 had severe regurgitation. The left atrial diameter in the SAR group  
234 remained larger than in the SPR group ( $P<0.001$ ), with no significant difference in left  
235 ventricular diameter ( $P=0.263$ ) and ejection fraction ( $P=0.001$ ). Detailed data are presented in  
236 Table 3. The changes in MR degree in the SAR and SPR groups are shown in Figure 3B and  
237 3C.

### 238 *Analysis of Risk Factors for Recurrence of AF*

239 Cox multivariate analysis indicated that AF recurrence in the MAR group was  
240 associated with a lack of regurgitation reduction (HR 0.0369; 95% CI 0.0026-0.5156;  
241  $P=0.0142$ ), reduction of left atrial diameter (HR 0.01865; 95% CI 0.0007-0.5016;  $P=0.0177$ ),  
242 and was independent of age, CHA2DS2–VASc score, preoperative or postoperative left atrial  
243 diameter. In severe MR, the risk factors for AF recurrence in the SAR group included  
244 postoperative left atrial diameter greater than 50 mm (HR 4.081; 95% CI 1.109-15.016;  
245  $P=0.0344$ ), with no association with age, AF duration, CHA2DS2–VASc score, preoperative  
246 left atrial diameter, or residual mitral regurgitation. In the SPR group, AF recurrence was  
247 associated with a postoperative left atrial diameter greater than 50 mm (HR 12.480; 95% CI  
248 1.288-120.898;  $P=0.0294$ ) and residual mitral regurgitation (HR 16.358; 95% CI 1.604-  
249 166.850;  $P=0.0183$ ), with no relation to age, AF duration, CHA2DS2–VASc score, or  
250 preoperative left atrial diameter. This study did not identify risk factors for the recurrence of  
251 mitral regurgitation in either group.

### 252 **Discussion**

253 AF and MR are progressive conditions that exacerbate each other, leading to more  
254 severe symptoms, rapid disease progression, and serious consequences such as heart failure

255 <sup>10</sup>. Timely and effective treatment is particularly important when AF is combined with MR <sup>11</sup>.  
256 We selected different treatment strategies based primarily on the degree of mitral  
257 regurgitation, which were all predicated on the treatment of AF. Our data suggests that for  
258 moderate AFMR combined with AF, rhythm control via thoracoscopic AF procedure yields  
259 satisfactory results. Maintenance of SR improves cardiac remodeling and reduces mitral  
260 regurgitation.

261 For severe AFMR combined with AF, we employed a combination of rhythm control  
262 and valvular intervention using the classic CMP IV surgical technique in conjunction with  
263 mitral valvuloplasty. This approach aligns with standard surgical guidelines for treating AF  
264 combined with severe MR. However, most previous evidence pertains to primary mitral  
265 regurgitation combined with AF, not AFMR combined with AF <sup>12,13</sup>. Our study demonstrates  
266 that the safety and efficacy of CMP IV combined with mitral valvuloplasty for severe AFMR  
267 with AF are comparable to the outcomes in primary mitral regurgitation with AF. AF is the  
268 initiating factor of AFMR, making it the primary target for treatment. In cases of functional  
269 mitral regurgitation, merely treating the regurgitation without addressing the primary disease  
270 often fails to yield favourable outcomes <sup>14</sup>. In cases of moderate regurgitation, the structural  
271 changes in the atrium and mitral valve are reversible <sup>15,16</sup>. Although rhythm control may  
272 reduce or eliminate mitral regurgitation through cardiac remodeling, the efficiency remains  
273 unsatisfactory <sup>17,18</sup>. The effectiveness of rhythm control is crucial in the management of AF.  
274 However, a large proportion of patients with AFMR have long-standing persistent AF,  
275 significant left atrium enlargement, high CHA2DS2–VASc scores, and other factors that  
276 impede successful treatment or maintenance of SR <sup>19</sup>. Previous research has shown that  
277 thoracoscopic surgery may be more effective than catheter ablation in SR maintenance <sup>20</sup>.  
278 The thoracoscopic technique provides high-quality pulmonary vein ablation, directly ablates  
279 the Marshall Ligament and autonomic ganglia from the epicardium, and enables left atrial

280 appendage excision. Our modified procedure includes the isolation of the left atrial posterior  
281 wall to further improve success rates<sup>21</sup>. Our data shows favourable results for AF patients  
282 with moderate AFMR, although subsequent catheter ablation may be required for patients  
283 with unsuccessful outcomes. This approach is reasonable for AFMR patients who require a  
284 more robust method to maintain SR and interrupt the cycle of AF, MR, and heart failure<sup>22</sup>.

285 Patients with severe AFMR are more challenging to manage for clinicians. We therefore  
286 utilized CMP-IV, a classic surgical technique for treating AF, which has the highest single  
287 success rate in clinical practice. Despite their increased age, complexity, and potential  
288 complications, patients with severe AFMR still require treatment options that offer a high  
289 degree success in maintaining SR. As such, these patients would benefit the most from  
290 individualized ablation strategies or further minimally invasive procedures.

291 AFMR is mitral regurgitation secondary to structural or functional abnormalities of the  
292 left atrium, leading to mitral annulus enlargement and an imbalance between annulus and  
293 leaflet area. Although functional in nature, AFMR may still involve abnormal mitral valvular  
294 structure<sup>23,24</sup>. Studies suggest that there is potential for mitral valve with structural  
295 abnormalities to recover with improved cardiac remodeling<sup>25</sup>. However, for most patients  
296 with severe AFMR, surgical valvuloplasty is a necessity due to underlying structural  
297 abnormalities<sup>26,27</sup>. In patients with AFMR, even with successful AF treatment, cardiac  
298 remodeling alone may not achieve the necessary changes in the left atrium and mitral valve.  
299 From the perspective of AF management, patients with AFMR and AF are often refractory to  
300 catheter ablation, thoracoscopic AF procedure, and even hybrid procedures. Therefore,  
301 treatment with CMP-IV should be prioritized, as it is more reasonable to undertake  
302 concomitant mitral valvuloplasty with its more definitive effect, over over cardiac remodeling  
303 with uncertain outcomes in MR<sup>28</sup>. According to current guidelines, severe MR should be

304 treated from a valvular management perspective. Without treatment, residual mitral  
305 regurgitation will self-progress and increase the inducibility of AF in the long run<sup>29</sup>.

### 306 **Limitations**

307 While this study addresses an important topic with paucity of data on the impact of  
308 therapy, it is constrained by its relatively small sample size and single-centre retrospective  
309 design. The sample size was limited due to the exclusion of patients with organic mitral valve  
310 disease (such as prolapse, flail leaflet, rheumatic disease, or mitral leaflet calcification) and  
311 the selection of patients with normal left ventricular morphology and function to minimize  
312 the interference caused by ventricular functional regurgitation. Propensity scoring matching  
313 could not be applied to compare the SAR and SPR groups due to the limited sample size.  
314 Patients with AFMR tend to be older, frailer, have more comorbidities, and have experienced  
315 AF for a longer duration. These characteristics may not be as apparent after propensity score  
316 matching.

### 317 **Conclusions**

318 Since AF is the primary cause of AFMR with AF, rhythm control therapy is the  
319 cornerstone treatment for these patients. Thoracoscopic AF procedure is an effective and  
320 minimally invasive treatment option for patients with AF and moderate AFMR. Moderate  
321 AFMR can be potentially reduced by SR restoration, which promotes cardiac remodeling.  
322 For patients with severe AFMR and AF, we recommend concomitant CMP-IV with mitral  
323 valvuloplasty. This approach is both safe and effective, increasing the success rate of  
324 achieving a resolution of both AF and MR.

325 **Acknowledgements:** We would like to thank Mr Yuanzhe Ma, Saie Shen M.D., Ms Huihua  
326 Chen and Ms Yu Su for their excellent experimental and clinical support.



327

## References

- 328 1. Gertz ZM, Raina A, Saghy L, et al. Evidence of atrial functional mitral regurgitation  
329 due to atrial fibrillation: reversal with arrhythmia control. *Journal of the American*  
330 *College of Cardiology*. 2011;58(14):1474-1481.
- 331 2. Abe Y, Takahashi Y, Shibata T. A new disease entity: Atrial functional mitral  
332 regurgitation. *Journal of cardiology*. 2021;77(6):565-569.
- 333 3. Ito K, Abe Y, Takahashi Y, et al. Mechanism of atrial functional mitral regurgitation  
334 in patients with atrial fibrillation: A study using three-dimensional transesophageal  
335 echocardiography. *Journal of cardiology*. 2017;70(6):584-590.
- 336 4. Kopecky SL, Gersh BJ, McGoon MD, et al. The natural history of lone atrial  
337 fibrillation. A population-based study over three decades. *The New England journal*  
338 *of medicine*. 1987;317(11):669-674.
- 339 5. Amabile A, Fereydooni S, Mori M, et al. Variable definitions and treatment  
340 approaches for atrial functional mitral regurgitation: A scoping review of the  
341 literature. *Journal of cardiac surgery*. 2022;37(5):1182-1191.
- 342 6. Badhwar V, Alkhouli M, Mack MJ, Thourani VH, Ailawadi G. A pathoanatomic  
343 approach to secondary functional mitral regurgitation: Evaluating the evidence. *The*  
344 *Journal of thoracic and cardiovascular surgery*. 2019;158(1):76-81.
- 345 7. Wagner CM, Brescia AA, Watt TMF, et al. Surgical strategy and outcomes for atrial  
346 functional mitral regurgitation: All functional mitral regurgitation is not the same! *The*  
347 *Journal of thoracic and cardiovascular surgery*. 2024;167(2):647-655.
- 348 8. El Sabbagh A, Reddy YNV, Nishimura RA. Mitral Valve Regurgitation in the  
349 Contemporary Era: Insights Into Diagnosis, Management, and Future Directions.  
350 *JACC Cardiovascular imaging*. 2018;11(4):628-643.
- 351 9. Zoghbi WA, Adams D, Bonow RO, et al. Recommendations for Noninvasive  
352 Evaluation of Native Valvular Regurgitation: A Report from the American Society of  
353 Echocardiography Developed in Collaboration with the Society for Cardiovascular  
354 Magnetic Resonance. *Journal of the American Society of Echocardiography : official*  
355 *publication of the American Society of Echocardiography*. 2017;30(4):303-371.
- 356 10. Vavalle JP, Arora S. Atrial Fibrillation: Not an Innocent Bystander in the Treatment  
357 of Functional Mitral Regurgitation. *JACC Cardiovascular interventions*.  
358 2020;13(20):2385-2387.
- 359 11. Tamargo M, Obokata M, Reddy YNV, et al. Functional mitral regurgitation and left  
360 atrial myopathy in heart failure with preserved ejection fraction. *European journal of*  
361 *heart failure*. 2020;22(3):489-498.
- 362 12. Otto CM, Nishimura RA, Bonow RO, et al. 2020 ACC/AHA Guideline for the  
363 Management of Patients With Valvular Heart Disease: A Report of the American  
364 College of Cardiology/American Heart Association Joint Committee on Clinical  
365 Practice Guidelines. *Journal of the American College of Cardiology*. 2021;77(4):e25-  
366 e197.
- 367 13. Vahanian A, Beyersdorf F, Praz F, et al. 2021 ESC/EACTS Guidelines for the  
368 management of valvular heart disease. *European heart journal*. 2022;43(7):561-632.
- 369 14. Deferm S, Bertrand PB, Verbrugge FH, et al. Atrial Functional Mitral Regurgitation:  
370 JACC Review Topic of the Week. *Journal of the American College of Cardiology*.  
371 2019;73(19):2465-2476.
- 372 15. Chen YC, Voskoboinik A, Gerche A, Marwick TH, McMullen JR. Prevention of  
373 Pathological Atrial Remodeling and Atrial Fibrillation: JACC State-of-the-Art  
374 Review. *Journal of the American College of Cardiology*. 2021;77(22):2846-2864.

- 375 16. Thomas L, Abhayaratna WP. Left Atrial Reverse Remodeling: Mechanisms,  
376 Evaluation, and Clinical Significance. *JACC Cardiovascular imaging*. 2017;10(1):65-  
377 77.
- 378 17. Soulat-Dufour L, Lang S, Addetia K, et al. Restoring Sinus Rhythm Reverses  
379 Cardiac Remodeling and Reduces Valvular Regurgitation in Patients With Atrial  
380 Fibrillation. *Journal of the American College of Cardiology*. 2022;79(10):951-961.
- 381 18. Ganesan AN, Shipp NJ, Brooks AG, et al. Long-term outcomes of catheter ablation of  
382 atrial fibrillation: a systematic review and meta-analysis. *Journal of the American*  
383 *Heart Association*. 2013;2(2):e004549.
- 384 19. Kisheva A, Yotov Y. Risk factors for recurrence of atrial fibrillation. *Anatolian*  
385 *journal of cardiology*. 2021;25(5):338-345.
- 386 20. Castellá M, Kotecha D, van Laar C, et al. Thoracoscopic vs. catheter ablation for  
387 atrial fibrillation: long-term follow-up of the FAST randomized trial. *Europace* :  
388 *European pacing, arrhythmias, and cardiac electrophysiology : journal of the*  
389 *working groups on cardiac pacing, arrhythmias, and cardiac cellular*  
390 *electrophysiology of the European Society of Cardiology*. 2019;21(5):746-753.
- 391 21. Ma N, Ding S, Zeng L, et al. Immediate electrophysiological characteristics following  
392 modified thoracoscopic ablation via unilateral approach for non-valvular atrial  
393 fibrillation. *Heart and vessels*. 2021;36(6):874-881.
- 394 22. Thomas JD, Raissi SR. Atrial Fibrillation Begets Mitral Regurgitation, or Is it Vice  
395 Versa? *JACC Cardiovascular imaging*. 2019;12(4):678-680.
- 396 23. Silbiger JJ. Does left atrial enlargement contribute to mitral leaflet tethering in  
397 patients with functional mitral regurgitation? Proposed role of atrigenic leaflet  
398 tethering. *Echocardiography (Mount Kisco, NY)*. 2014;31(10):1310-1311.
- 399 24. Kihara T, Gillinov AM, Takasaki K, et al. Mitral regurgitation associated with mitral  
400 annular dilation in patients with lone atrial fibrillation: an echocardiographic study.  
401 *Echocardiography (Mount Kisco, NY)*. 2009;26(8):885-889.
- 402 25. Nishino S, Watanabe N, Ashikaga K, et al. Reverse Remodeling of the Mitral Valve  
403 Complex After Radiofrequency Catheter Ablation for Atrial Fibrillation: A Serial 3-  
404 Dimensional Echocardiographic Study. *Circulation Cardiovascular imaging*.  
405 2019;12(10):e009317.
- 406 26. Luo Y, Zhu Y, Guan X, Lin Y. Assessment of mitral annulus and mitral leaflet in  
407 nonvalvular atrial fibrillation patients with various degrees of mitral regurgitation:  
408 Real time 3D transesophageal echocardiography. *Echocardiography (Mount Kisco,*  
409 *NY)*. 2018;35(4):481-486.
- 410 27. Debonnaire P, Al Amri I, Leong DP, et al. Leaflet remodelling in functional mitral  
411 valve regurgitation: characteristics, determinants, and relation to regurgitation  
412 severity. *European heart journal Cardiovascular Imaging*. 2015;16(3):290-299.
- 413 28. Wei K, Bao C, Zhao D, Zhang J, Mei J, Ma N. Effectiveness of Maze IV procedure  
414 versus thoracoscopic ablation for atrial fibrillation: a propensity score-matched  
415 analysis. *Annals of cardiothoracic surgery*. 2024;13(2):165-172.
- 416 29. Nakamura K, Takagi T, Kogame N, et al. Impact of atrial mitral and tricuspid  
417 regurgitation on atrial fibrillation recurrence after ablation. *Journal of*  
418 *electrocardiology*. 2021;66:114-121.

419

420

421 **Figure legend**

422 Figure 1 Six-year Kaplan-Meier curve for freedom from AF recurrence and comparison of  
423 mitral regurgitation reduction between SR and non-SR patients.

424 Figure 1A. Six-year Kaplan-Meier curve for atrial fibrillation (AF) patients with moderate  
425 atrial functional mitral regurgitation (AFMR) freedom from AF recurrence. 1B Sinus rhythm  
426 (SR) maintenance of AF patients with moderate AFMR benefits mitral regurgitation  
427 reduction ( $P<0.0001$ ) compared to the non-SR patients.

428

429 Figure 2 Comparison of left atrial diameters between SR patients and non-SR patients and the  
430 changes in the degree of mitral regurgitation following thoracoscopic AF procedure.

431 Figure 2A. Comparison of left atrial diameters between sinus rhythm (SR) patients and non-  
432 SR patients with moderate atrial functional mitral regurgitation (AFMR) and atrial fibrillation  
433 (AF) at different time points (pre-procedure, post-procedure, and at the last follow-up).

434 At the last follow-up, the left atrial diameter was  $45.04\pm 3.48$  mm in SR patients vs.  
435  $49.60\pm 4.81$  mm in non-SR patients ( $P=0.004$ ), a statistically significant difference. 2B. The  
436 corresponding changes in the degree of mitral regurgitation in SR and non-SR patients with  
437 moderate AFMR and AF.

438 Figure 3 Kaplan-Meier (KM) curves of SR maintenance rate and the changes in the degree of  
439 mitral regurgitation following mitral valvuloplasty plus the Cox Maze IV procedure

440 Figure 3A. KM curves of sinus rhythm (SR) maintenance rate for severe atrial functional  
441 mitral regurgitation patients with atrial fibrillation (AF) and severe primary mitral  
442 regurgitation patients with AF. The KM curves showed no statistical difference between the  
443 two groups following Cox Maze IV procedure. 3B. the degree of mitral regurgitation in atrial

444 fibrillation (AF) patients with severe atrial functional mitral regurgitation and those with  
445 severe primary mitral regurgitation before the procedure.<sup>3C</sup> the degree of mitral regurgitation  
446 in AF patients with severe atrial functional mitral regurgitation and those with severe primary  
447 mitral regurgitation after the procedure.

448

449

450

451

452

453

454

455

456

457

458

459

460

461 **Table 1 Patient Characteristics of three groups. Patients with moderate atrial functional mitral**  
 462 **regurgitation (AFMR) and atrial fibrillation (AF) (MAR group). Patients with severe AFMR**  
 463 **and AF (SAR group). Patients with severe primary mitral regurgitation and AF (SPR group).**

| Characteristics                       | MAR(n=33)            | SAR (n = 56)         | SPR (n = 56)         | P-Value(SAR/SPR) | SMD   |
|---------------------------------------|----------------------|----------------------|----------------------|------------------|-------|
| Age, year, mean ± SD                  | 70.27±6.46           | 70.54±5.91           | 66.43±6.39           | 0.001            | 0.667 |
| Male (%)                              | 20 (60.61)           | 37 (66.1)            | 36 (64.3)            | >0.999           | 0.037 |
| Hypertension (%)                      | 19 (57.58)           | 42 (75.0)            | 27 (48.2)            | 0.007            | 0.573 |
| Diabetes (%)                          | 10 (30.30)           | 15 (26.8)            | 9 (16.1)             | 0.25             | 0.263 |
| Previous cerebrovascular accident (%) | 3 (9.09)             | 7 (12.5)             | 4 (7.1)              | 0.525            | 0.181 |
| Coronary artery disease (%)           | 8 (24.24)            | 15 (26.8)            | 6 (10.7)             | 0.053            | 0.421 |
| NYHA class III-IV (%)                 | 15 (45.45)           | 34 (60.7)            | 38 (67.9)            | 0.554            | 0.149 |
| CHA2DS2-VASC Score (median [IQR])     | 3.00 [3.00,4.00]     | 3.00 [3.00, 4.00]    | 2.00 [2.00, 3.00]    | 0.001            | 0.647 |
| Duration of AF (median [IQR])         | 72.00 [48.00,108.00] | 66.00 [36.00, 96.00] | 60.00 [24.00, 72.00] | 0.02             | 0.465 |

464

465

466

467

468

469

470

471

472

473

474

475

476

477 **Table 2 Postoperative complications of patients with severe atrial functional mitral**  
478 **regurgitation and atrial fibrillation (AF) (SAR group) and patients with severe primary mitral**  
479 **regurgitation and AF (SPR group).**

| Postoperative Event       | SAR (n = 56)        | SPR (n = 56)      | P.value |
|---------------------------|---------------------|-------------------|---------|
| Stroke                    | 2                   | 0                 | 0.495   |
| Pneumonia                 | 6                   | 3                 | 0.489   |
| Poor wound healing        | 1                   | 0                 | >0.999  |
| Prolonged ventilation     | 7                   | 4                 | 0.527   |
| Acute renal failure       | 4                   | 1                 | 0.364   |
| Blood product transfusion | 7                   | 2                 | 0.162   |
| Reoperation for bleeding  | 1                   | 0                 | >0.999  |
| New pacemaker             | 3                   | 1                 | 0.618   |
| Mortality within 30 days  | 2                   | 0                 | 0.495   |
| Stays, day (median [IQR]) | 10.00 [9.00, 12.75] | 7.00 [7.00, 8.25] | <0.001  |

480

481

482

483

484

485

486

487

488

489

490

491

492

493

494

495 **Table 3 Comparison of cardiac remodeling between patients with severe atrial functional mitral**  
 496 **regurgitation and atrial fibrillation (AF) (SAR group) and patients with severe primary mitral**  
 497 **regurgitation and AF (SPR group).**

| Characteristics          | SAR (n = 54) | SPR (n = 56) | P-Value | SMD   |
|--------------------------|--------------|--------------|---------|-------|
| preLAD, mm, mean ± SD    | 54.61±5.57   | 53.95±5.22   | 0.519   | 0.123 |
| preLVEDD, mm, mean ± SD  | 50.61±3.85   | 56.30±5.84   | <0.001  | 1.150 |
| preLVEF (%), mean ± SD   | 55.65±3.77   | 51.48±4.85   | <0.001  | 0.960 |
| postLAD, mm, mean ± SD   | 48.31±2.60   | 46.45±3.07   | 0.001   | 0.656 |
| postLVEDD, mm, mean ± SD | 49.41±2.93   | 50.64±4.18   | 0.077   | 0.342 |
| postLVEF (%), mean ± SD  | 54.87±5.46   | 49.25±5.87   | <0.001  | 0.992 |
| fLAD, mm, mean ± SD      | 48.46±3.80   | 46.02±2.94   | <0.001  | 0.720 |
| fLVEDD, mm, mean ± SD    | 51.52±3.54   | 52.29±3.61   | 0.263   | 0.214 |
| fLVEF (%), mean ± SD     | 54.80±4.93   | 51.27±5.94   | 0.001   | 0.646 |

498 preLAD, pre-operative left atrial diameter; preLVEDD, pre-operative left ventricular end-diastolic  
 499 diameter; preLVEF, pre-operative left ventricular ejection fraction; postLAD, post-operative left atrial  
 500 diameter; postLVEDD, post-operative left ventricular end-diastolic diameter; preLVEF, post-  
 501 operative left ventricular ejection fraction; fLAD, follow-up left atrial diameter; fLVEDD, follow-up  
 502 left ventricular end-diastolic diameter; fLVEF, follow-up left ventricular ejection fraction

503

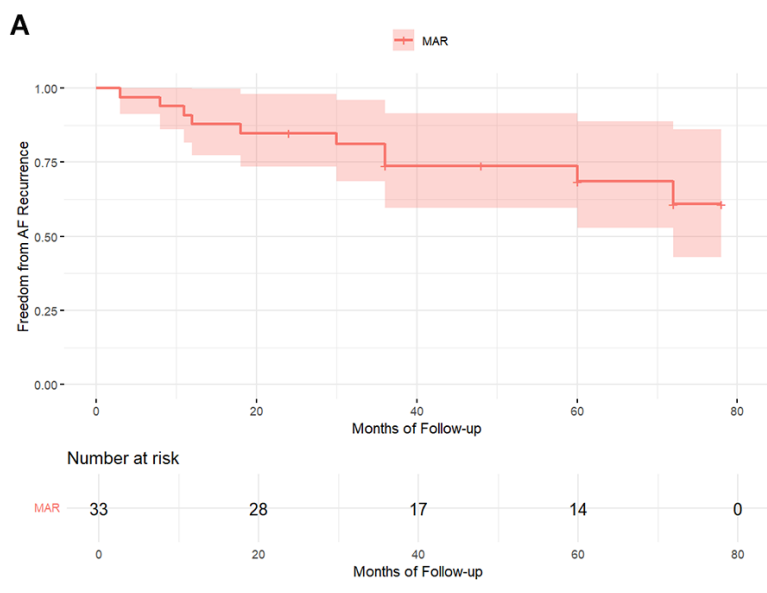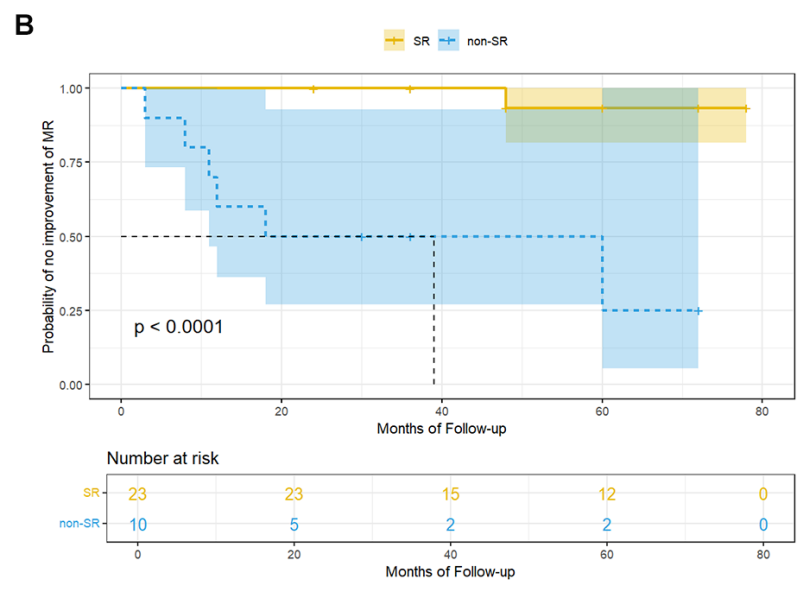



**A**

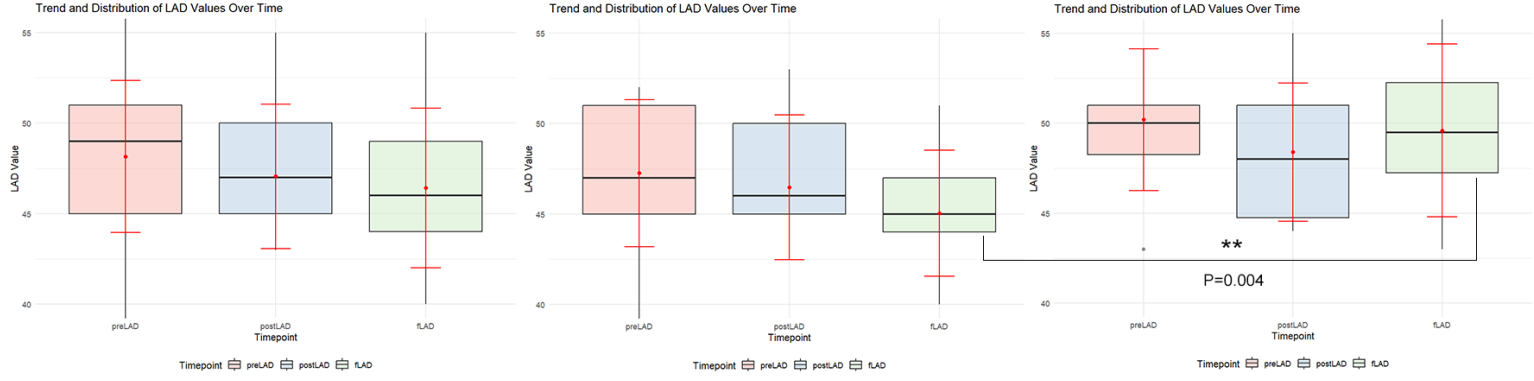

**B**

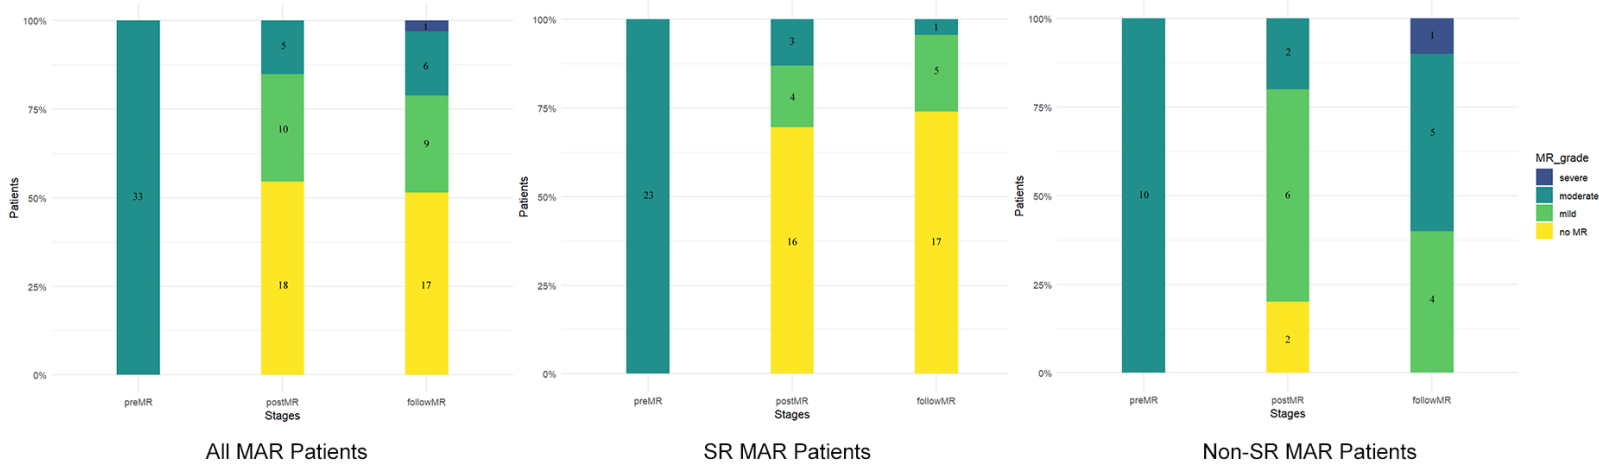

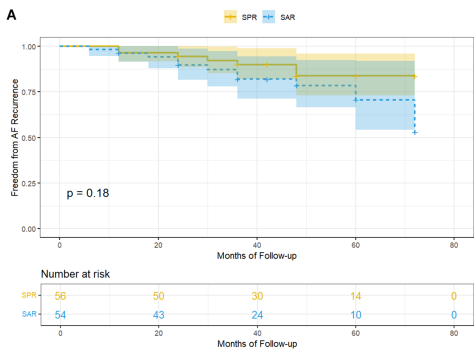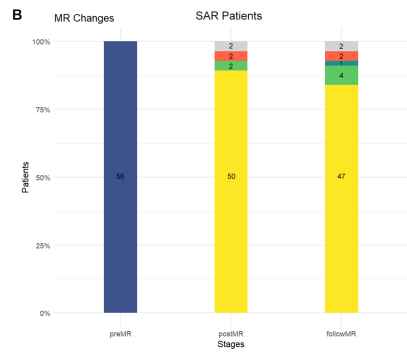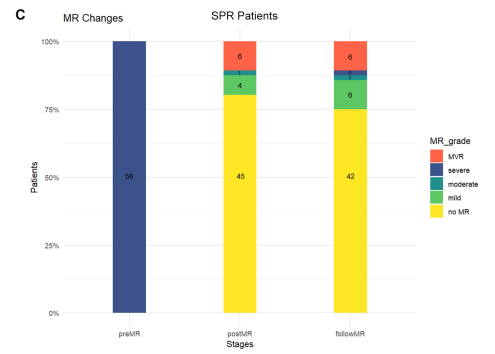

Source: https://medrxiv.org/content/medrxiv/early/2024/09/25/2024.09.23.24314258.full.pdf
